# Supplementary material
Source: PubMed Central journal article supplement (PMC2692447)

Supplemental Figure 1

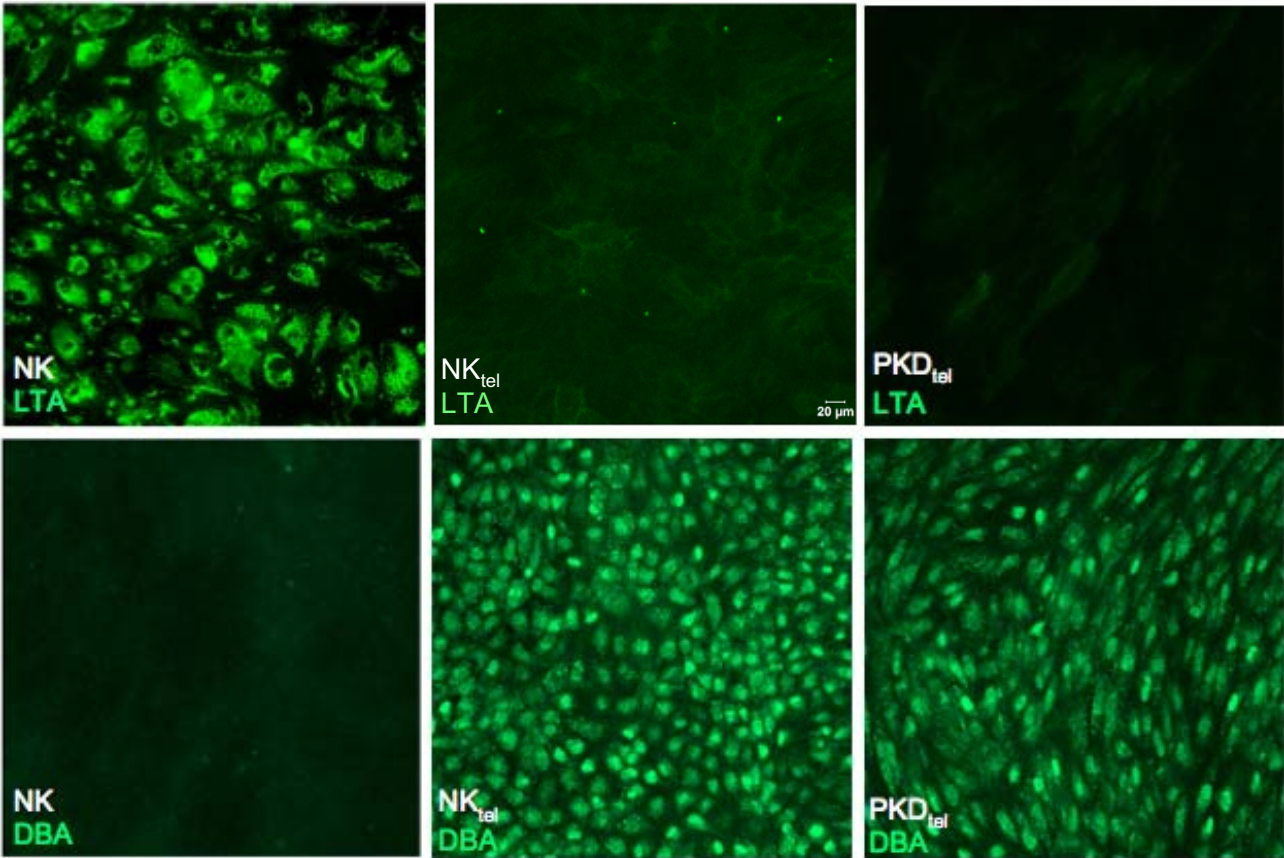

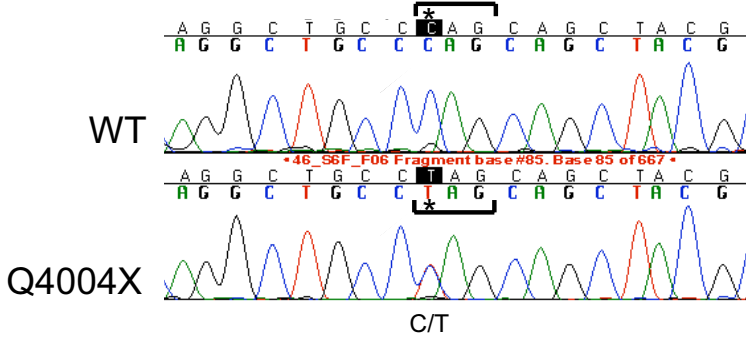

Supplemental Figure 3

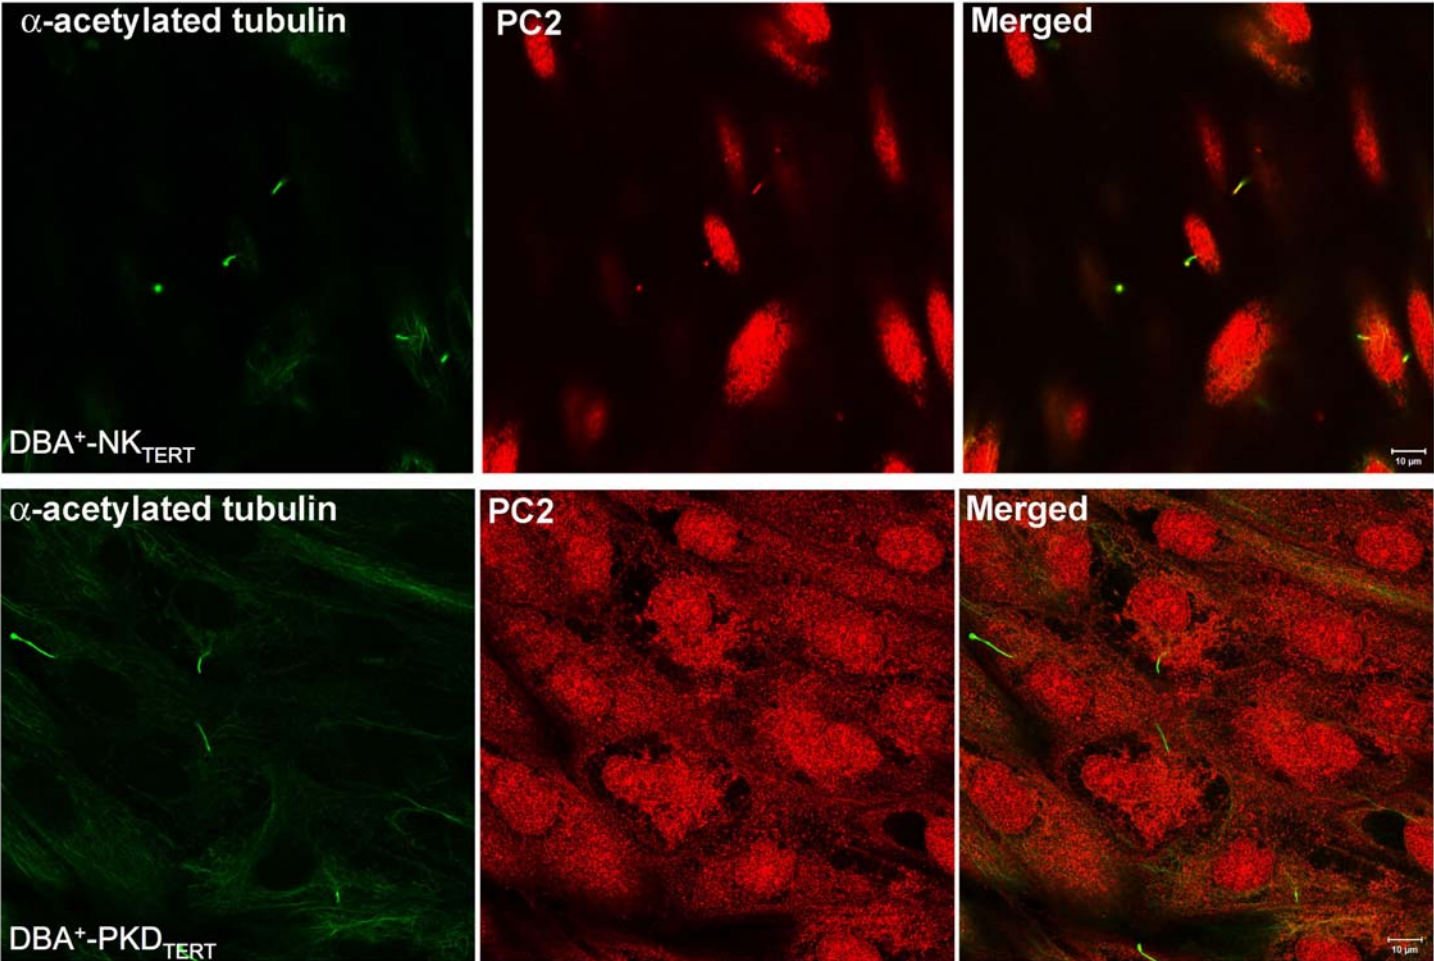

Supplemental Figure 4

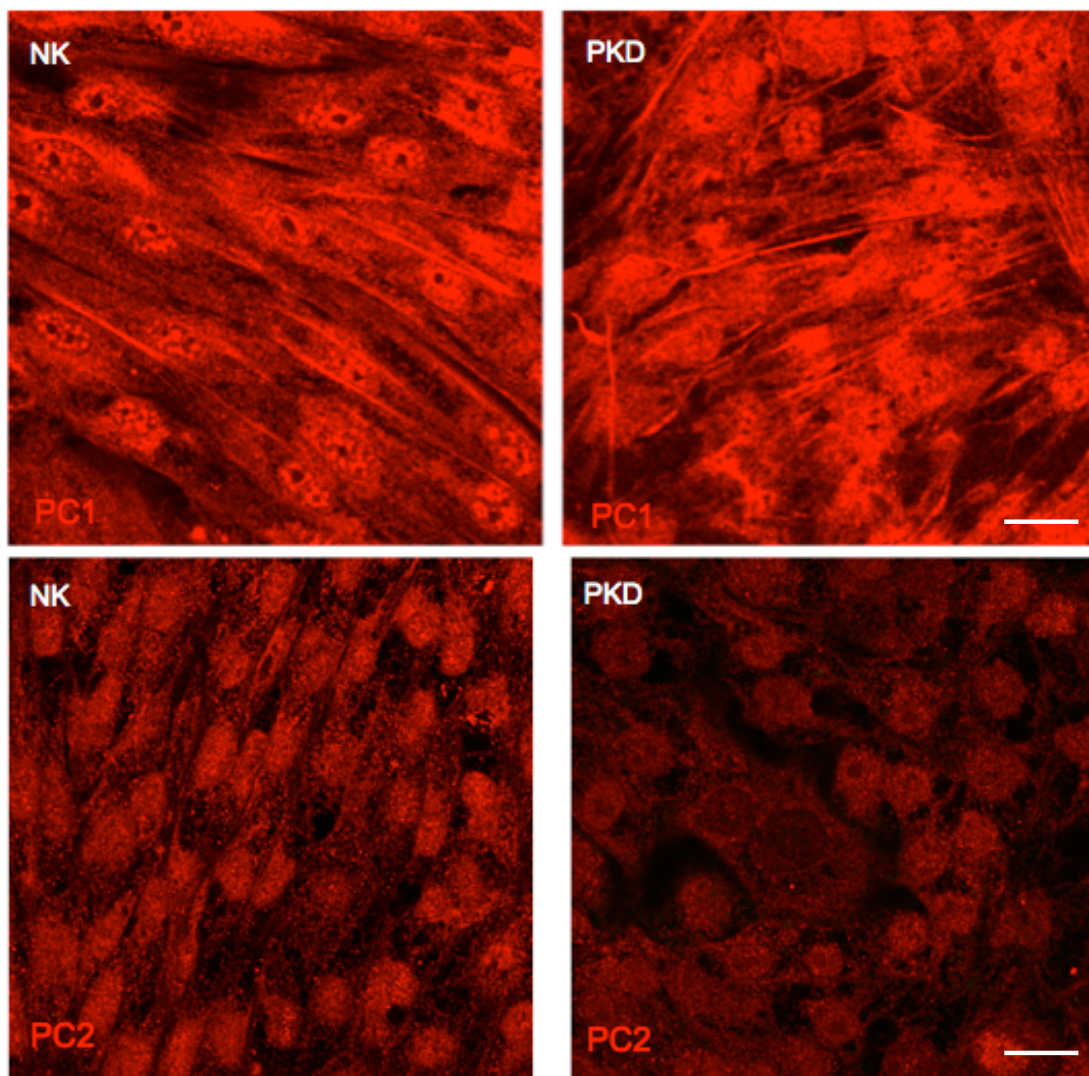

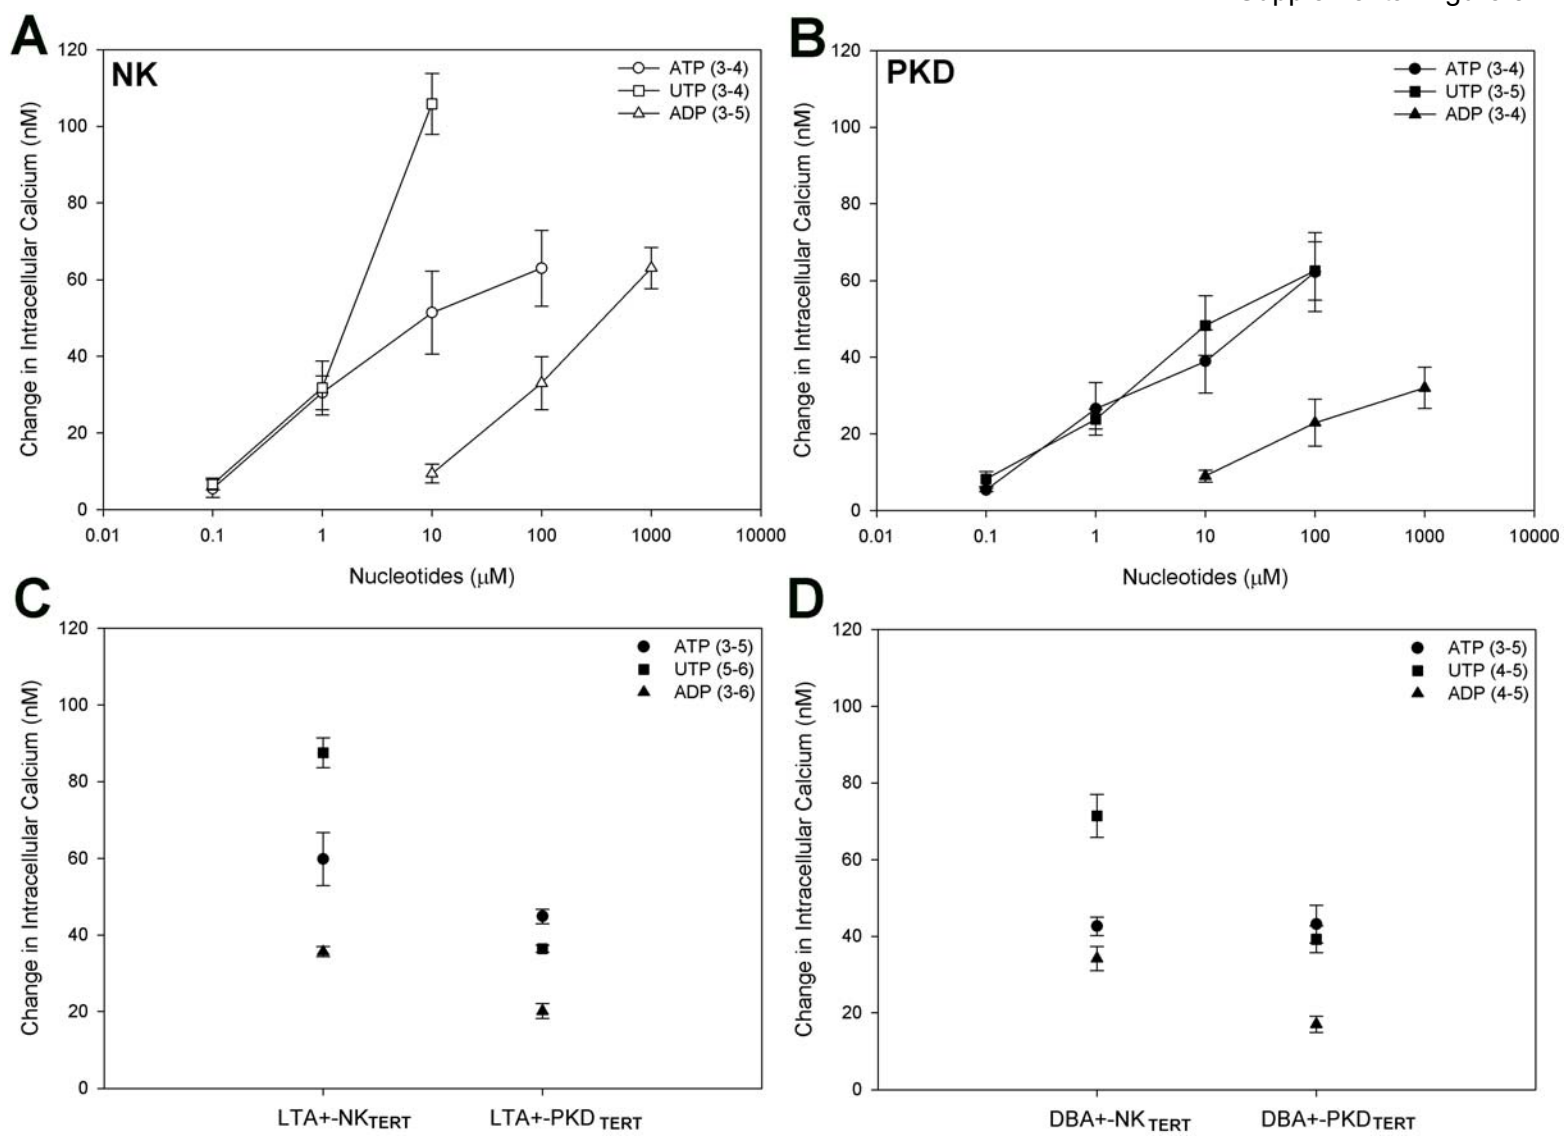

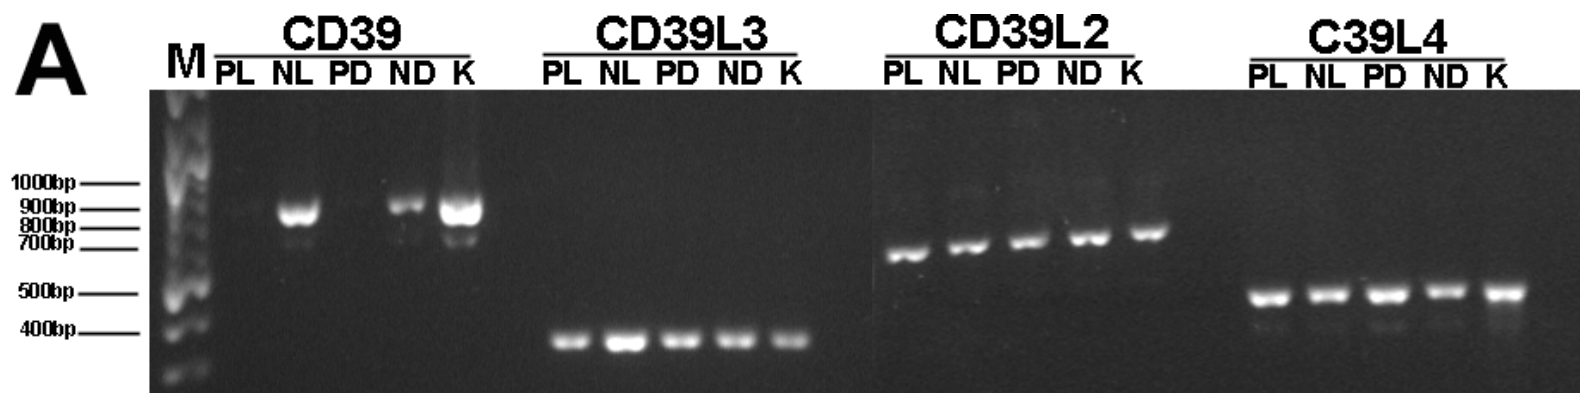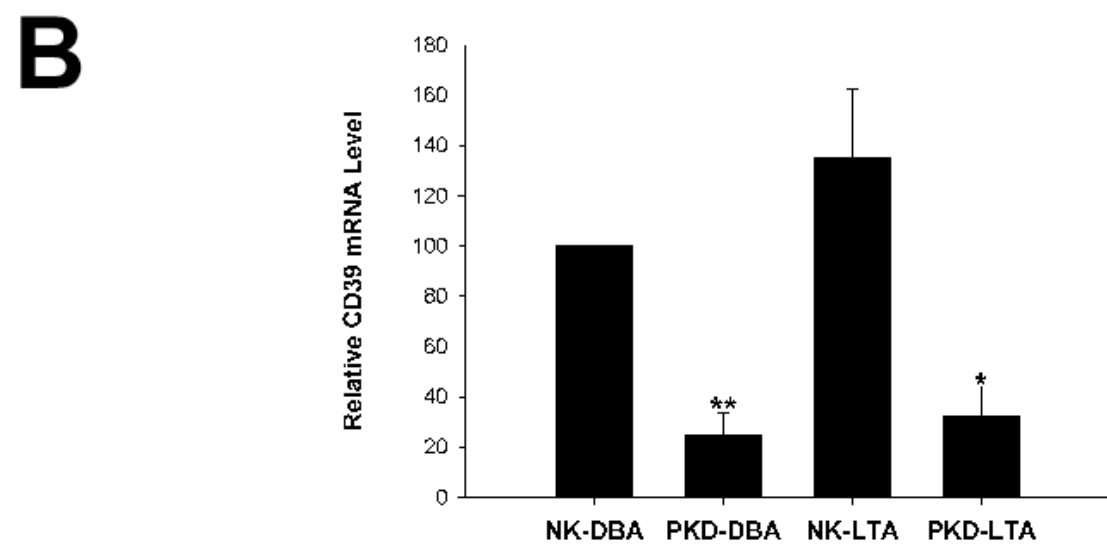

Supplemental Figure 6



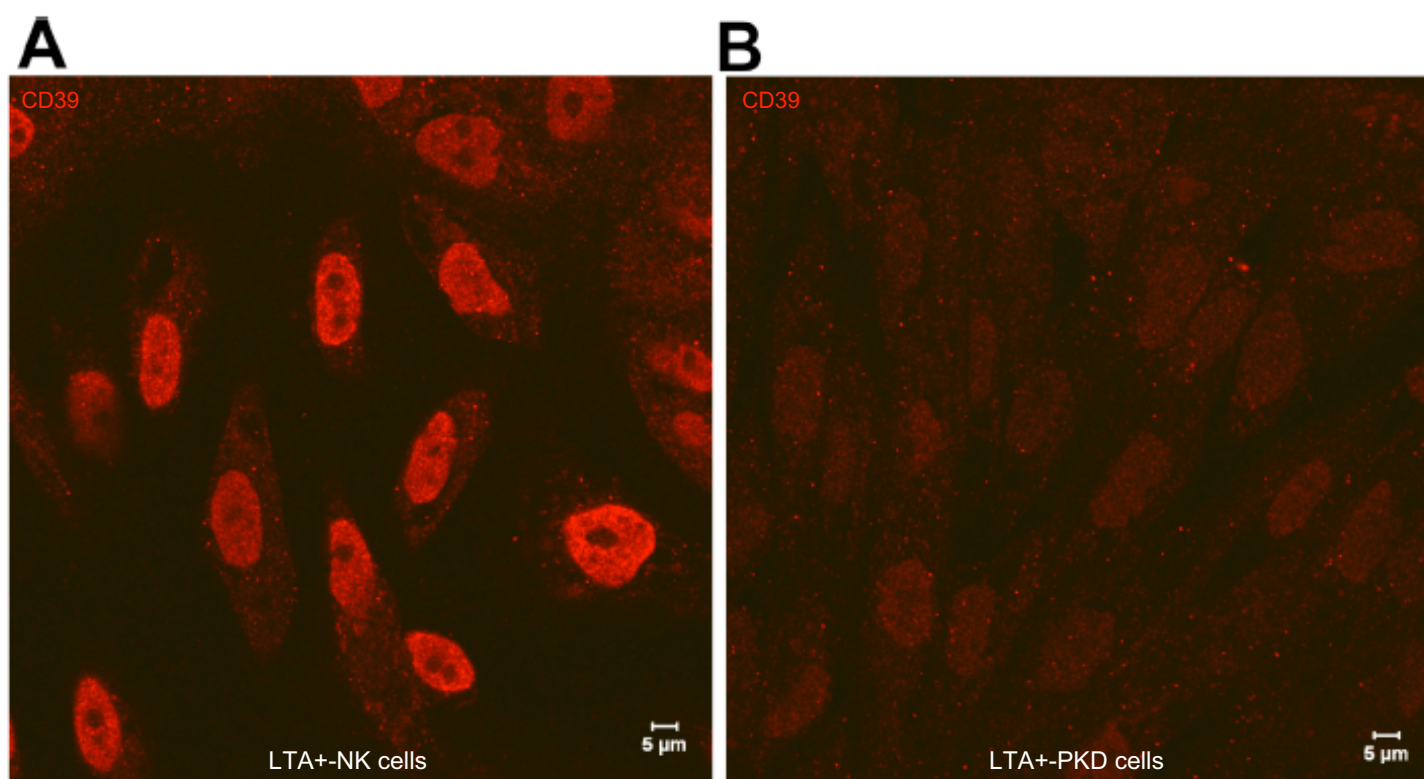

Supplement: 90542.2008_1.pdf [file 90542.2008_1.pdf]
